# Supplementary material for: Delving into the Aftermath of a Disease-Associated Near-Extinction Event: A Five-Year Study of a Serpentovirus (Nidovirus) in a Critically Endangered Turtle Population
Source: MDPI journal article supplement (doi:10.3390/v16040653), 2024-04-22
Supplement: s1 [file s1]

**Table S3.** Epidemiological data for wild turtles captured in the Bellinger River as a single assemblage, November 2015–November 2020 – univariate analysis and multivariate logistic regression model

| Inferential test (X <sup>2</sup> , Fisher's exact test or Mann Whitney test) |                           |          |                            |          | Univariate Logistic Model |          | Multivariate Logistic Model |                       |          |       |
|------------------------------------------------------------------------------|---------------------------|----------|----------------------------|----------|---------------------------|----------|-----------------------------|-----------------------|----------|-------|
| Factors                                                                      | Categories                | Negative | Positive<br>(Prevalence %) | <i>p</i> | OR (95% CI)               | <i>p</i> | AIC                         | Corrected OR (95% CI) | <i>p</i> | AIC   |
| Species                                                                      | <i>Emydura macquarii</i>  | 310      | 3 (0.96%)                  | <0.001^  | 11.97 (4.01-51.48)        | <0.001   | 159.88                      | 62.60 (12.93-410.06)  | <0.001   | 139.1 |
|                                                                              | <i>Myuchelys georgesi</i> | 164      | 19 (10.38%)                |          |                           |          |                             |                       |          |       |
| Sex                                                                          | Unknown                   | 225      | 10 (4.26%)                 | 0.469^   | 0.71 (0.19-2.17)          | 0.567    | 184.60                      | Excluded              |          |       |
|                                                                              | Female                    | 127      | 4 (3.05%)                  |          |                           |          |                             |                       |          |       |
|                                                                              | Male                      | 122      | 8 (6.15%)                  |          |                           |          |                             |                       |          |       |
| Size                                                                         | SCL                       | 474      | 22 (4.44%)                 | 0.469#   | 1.00 (0.99-1.01)          | 0.538    | 183.71                      | 1.03 (1.01-1.04)      | 0.001    |       |
|                                                                              |                           |          |                            |          |                           |          |                             |                       |          |       |
| Location                                                                     | Bellingen                 | 279      | 11 (3.79%)                 | 0.001*   | 2.85 (1.18-6.85)          | 0.018    | 170.87                      | 0.87 (0.28-2.51)      | 0.801    |       |
|                                                                              | Thora                     | 98       | 11 (10.09%)                |          |                           |          |                             |                       |          |       |
|                                                                              | Darkwood                  | 97       | 0 (0%)                     |          |                           |          |                             |                       |          |       |
| Year                                                                         | 2015                      | 68       | 10 (12.82%)                | 0.016*   | 0.28 (0.10-0.74)          | 0.010    | 176.83                      | 0.30 (0.09-0.94)      | 0.036    |       |
|                                                                              | 2016                      | 193      | 8 (3.98%)                  |          |                           |          |                             |                       |          |       |
|                                                                              | 2017                      | 100      | 3 (2.91%)                  |          |                           |          |                             |                       |          |       |
|                                                                              | 2018                      | 77       | 1 (1.28%)                  |          |                           |          |                             |                       |          |       |
|                                                                              | 2019                      | 34       | 0 (0%)                     |          |                           |          |                             |                       |          |       |
|                                                                              | 2020                      | 2        | 0 (0%)                     |          |                           |          |                             |                       |          |       |

A subset (n=496) of the 507 records were included for univariate and multivariate analysis. Statistically significant = **BOLD**, \* Fisher's Exact Test, ^ Chi-Square Test, #Mann-Whitney test.
