# Supplementary material for: Delving into the Aftermath of a Disease-Associated Near-Extinction Event: A Five-Year Study of a Serpentovirus (Nidovirus) in a Critically Endangered Turtle Population
Source: MDPI journal article supplement (doi:10.3390/v16040653), 2024-04-22
Supplement: s1 [file s1]

**Table S2.** Epidemiological data for all wild turtles captured in the Bellinger River, November 2015–November 2020 – univariate analysis.

| Variable | Categories          | N   | Positive (%;95% CI) | Negative      | <i>p</i>           | df  |
|----------|---------------------|-----|---------------------|---------------|--------------------|-----|
| Species  | <i>E. macquarii</i> | 313 | 3 (1.0; 0.3-2.8)    | 316           | <0.001*            | 2   |
|          | <i>M. georgesi</i>  | 185 | 20 (10.8; 7.1-16.1) | 165           |                    |     |
|          | Hybrid              | 6   | 1 (16.7; 3.0-56.4)  | 5             |                    |     |
| Sex      | Unknown             | 235 | 10 (4.3; 2.3-7.7)   | 225           | 0.451^             | 2   |
|          | Female              | 137 | 5 (3.7; 1.6-8.3)    | 132           |                    |     |
|          | Male                | 135 | 9 (6.7; 3.6-12.2)   | 126           |                    |     |
| Location | Bellingen           | 292 | 11 (3.8; 2.1-6.6)   | 281           | <0.001*            | 2   |
|          | Thora               | 115 | 13 (11.3; 6.7-18.4) | 102           |                    |     |
|          | Darkwood            | 100 | 0 (0; 0-3.7)        | 100           |                    |     |
| Year     | 2015                | 78  | 10 (12.8; 7.1-22.0) | 68            | 0.020*             | 5   |
|          | 2016                | 209 | 10 (4.8-2.6-8.6)    | 199           |                    |     |
|          | 2017                | 104 | 3 (2.9; 0.1-8.1)    | 101           |                    |     |
|          | 2018                | 79  | 1 (1.3; 0.2-6.8)    | 78            |                    |     |
|          | 2019                | 34  | 0 (0-9.0)           | 34            |                    |     |
|          | 2020                | 3   | 0 (0-56.2)          | 3             |                    |     |
| Variable | Categories          | N   | Positive            | Negative      | <i>P</i>           | df  |
| Size     | SCL (mm)            | 501 | 135.3 (63.3)        | 138.0 (71.3)  | 0.428 <sup>#</sup> | 500 |
|          | Mass (grams)        | 499 | 300.0 (312.0)       | 288.3 (420.8) | 0.742 <sup>#</sup> | 498 |

Results for turtles caught during ‘routine surveys’ only. Results of recaptured turtles were not included in this table. Statistically significant = **BOLD**, \* Fisher’s Exact Test, ^ Chi-Square Test, <sup>#</sup>Mann-Whitney test. SCL (mm) and mass (g) reported as median and interquartile range (IQR) for each positive and negative turtle group
