# Supplementary material for: Delving into the Aftermath of a Disease-Associated Near-Extinction Event: A Five-Year Study of a Serpentovirus (Nidovirus) in a Critically Endangered Turtle Population
Source: MDPI journal article supplement (doi:10.3390/v16040653), 2024-04-22
Supplement: s1 [file s1]

**Table S1.** Numbers of sampled wild turtles caught for all purposes including recaptures along with the number of BRV RNA reactor samples (+) in the Bellinger River in NSW

| Survey                                                    | No. turtles caught | No turtles for molecular testing (BRV RNA + <sup>a</sup> ) | Prevalence % (95%CI)   | Conjunctival swab (BRV RNA +) | Oral swab (BRV RNA +) | Cloacal swab (BRV RNA +) | No ID swab (BRV RNA +) | Total samples (BRV RNA +) |
|-----------------------------------------------------------|--------------------|------------------------------------------------------------|------------------------|-------------------------------|-----------------------|--------------------------|------------------------|---------------------------|
| <i>Myuchelys georgesi</i>                                 |                    |                                                            |                        |                               |                       |                          |                        |                           |
| November 2015 <sup>b</sup>                                | 29                 | 29 (8)                                                     | 27.6 (14.7-45.7)       | 29 (8)                        | 15 (2)                | 18 (0)                   | 11 (0)                 | 73 (10)                   |
| March 2016                                                | 69                 | 58 (4)                                                     | 6.9 (2.7-16.4)         | 58 (4)                        | 52 (0)                | 58 (0)                   | 4 (0)                  | 172 (4)                   |
| October/November/December 2016                            | 73                 | 61 (11)                                                    | 18.0 (10.4-29.5)       | 61 (11)                       | 0 (0)                 | 0(0)                     | 0(0)                   | 61 (11)                   |
| February 2017                                             | 14                 | 0 (0)                                                      | N/A                    | 0 (0)                         | 0 (0)                 | 0 (0)                    | 0 (0)                  | 0 (0)                     |
| November 2017                                             | 43                 | 41 (5)                                                     | 12.2 (5.3-25.5)        | 41 (5)                        | 28 (5)                | 36 (1)                   | 0 (0)                  | 105 (11)                  |
| April 2018                                                | 25                 | 18 (2)                                                     | 11.1 (3.1-32.8)        | 18 (2)                        | 11 (0)                | 18 (0)                   | 0 (0)                  | 47 (2)                    |
| November 2018                                             | 51                 | 49 (5)                                                     | 10.2 (4.4-21.8)        | 49 (5)                        | 45 (1)                | 49 (0)                   | 0 (0)                  | 143 (6)                   |
| March/April 2019                                          | 6                  | 6 (0)                                                      | 0 (0-39.0)             | 6 (0)                         | 4 (0)                 | 6 (0)                    | 0 (0)                  | 16 (0)                    |
| November/December 2019                                    | 29                 | 25 (0)                                                     | 0 (0-13.3)             | 25 (0)                        | 1 (0)                 | 1 (0)                    | 0 (0)                  | 27 (0)                    |
| October/November 2020                                     | 13                 | 12 (0)                                                     | 0 (0-24.3)             | 12 (0)                        | 0 (0)                 | 0 (0)                    | 0 (0)                  | 12 (0)                    |
| <b>Total:</b>                                             | <b>352</b>         | <b>299 (35)</b>                                            | <b>11.7 (8.5-15.8)</b> | <b>299 (35)</b>               | <b>156 (8)</b>        | <b>186 (1)</b>           | <b>15 (0)</b>          | <b>656 (44)</b>           |
| <i>Emydura macquarii</i>                                  |                    |                                                            |                        |                               |                       |                          |                        |                           |
| November 2015 <sup>b</sup>                                | 49                 | 49 (2)                                                     | 4.1 (1.1-13.7)         | 49 (2)                        | 43 (0)                | 43 (0)                   | 0 (0)                  | 135 (2)                   |
| March 2016                                                | 100                | 87 (0)                                                     | 0 (0-4.2)              | 87 (0)                        | 86 (0)                | 86 (0)                   | 0 (0)                  | 259 (0)                   |
| November/December 2016                                    | 71                 | 57 (1)                                                     | 1.8 (0.3-9.3)          | 57 (1)                        | 0 (0)                 | 0 (0)                    | 0 (0)                  | 57 (1)                    |
| February 2017                                             | 4                  | 0 (0)                                                      | N/A                    | 0 (0)                         | 0 (0)                 | 0 (0)                    | 0 (0)                  | 0 (0)                     |
| November 2017                                             | 176                | 97 (0)                                                     | 0 (0-3.8)              | 97 (0)                        | 0 (0)                 | 0 (0)                    | (0)                    | 97 (0)                    |
| April 2018                                                | 13                 | 1 (0)                                                      | 0 (0-79.4)             | 1 (0)                         | 1 (0)                 | 1 (0)                    | 0 (0)                  | 3 (0)                     |
| November 2018                                             | 153                | 72 (0)                                                     | 0 (0-5.1)              | 72 (0)                        | 0 (0)                 | 0 (0)                    | 0 (0)                  | 72 (0)                    |
| March/April 2019                                          | 24                 | 9 (0)                                                      | 0 (0-29.9)             | 9 (0)                         | 0 (0)                 | 0 (0)                    | 0 (0)                  | 9 (0)                     |
| November/December 2019                                    | 132                | 41 (0)                                                     | 0 (0-8.6)              | 41 (0)                        | 1 (0)                 | 0 (0)                    | 0 (0)                  | 42 (0)                    |
| November 2020                                             | 166                | 0 (0)                                                      | N/A                    | 0 (0)                         | 0 (0)                 | 0 (0)                    | 0 (0)                  | 0 (0)                     |
| <b>Total:</b>                                             | <b>888</b>         | <b>413 (3)</b>                                             | <b>0.7 (0.3-2.1)</b>   | <b>413(3)</b>                 | <b>131 (0)</b>        | <b>130 (0)</b>           | <b>0 (0)</b>           | <b>674 (3)</b>            |
| <i>Myuchelys georgesi</i> x <i>Emydura macquarii</i> (F1) |                    |                                                            |                        |                               |                       |                          |                        |                           |
| March 2016                                                | 1                  | 1 (0)                                                      | 0 (0-79.4)             | 1 (0)                         | 1 (0)                 | 1 (0)                    | 0 (0)                  | 3 (0)                     |
| November/December 2016                                    | 3                  | 3 (1)                                                      | 33.3 (6.2-79.2)        | 3 (1)                         | 0 (0)                 | 0 (0)                    | 0 (0)                  | 3 (1)                     |
| November 2017                                             | 3                  | 3 (0)                                                      | 0 (0-56.2)             | 3 (0)                         | 3 (0)                 | 2 (0)                    | 0 (0)                  | 8 (0)                     |
| November 2020                                             | 2                  | 2 (0)                                                      | 0 (0-65.8)             | 2 (0)                         | 0 (0)                 | 0 (0)                    | 0 (0)                  | 2 (0)                     |
| <b>Total:</b>                                             | <b>9</b>           | <b>9 (1)</b>                                               | <b>11.1 (2.0-43.5)</b> | <b>9 (1)</b>                  | <b>4 (0)</b>          | <b>3 (0)</b>             | <b>0 (0)</b>           | <b>16 (1)</b>             |
| <b>All turtle species</b>                                 | <b>1249</b>        | <b>721 (39)</b>                                            | <b>5.4 (4.0-7.3)</b>   | <b>721 (39)</b>               | <b>291 (8)</b>        | <b>319 (1)</b>           | <b>15 (0)</b>          | <b>1346 (48)</b>          |

Results of turtles caught for all purposes including surveys, additional research, survey method validation. Results of recaptured turtles were included in this table. Turtles were reactive for BRV RNA on a conjunctival (ocular) swabs (\*). Data previously reported in Zhang et al (2018) (\*). N/A – not applicable
